# Supplementary material
Source: Elsevier journal article supplement (https://www.sciencedirect.com/science/article/pii/S0212656716302104)
Supplement: mmc1 [file S0212656716302104:mmc1.docx]

**Lógica de agrupación de los Grupos de Morbilidad Ajustados**

**Conceptos básicos**

Partimos de un fichero de entrada en el que disponemos de la información de los problemas de salud (diagnósticos) de los asegurados. Cada registro del fichero de entrada corresponde a un problema de salud. Los campos necesarios son:

- identificación del asegurado
- clasificación diagnóstica utilizada
- código del problema de salud
- fecha de diagnóstico
- fecha de nacimiento
- sexo del asegurado

Los campos relativos a la fecha de nacimiento y el sexo en realidad no se tienen en cuenta para la agrupación sino para llevar a cabo una validación previa de los códigos diagnósticos y evitar incongruencias por estos factores.

Cabe destacar que utilizamos la fecha de diagnóstico y no la del contacto. En realidad en los GMA lo que nos interesa es conocer la morbilidad del asegurado y no la complejidad de los contactos asistenciales.

Existen diferentes clasificaciones y versiones de codificación diagnóstica. El agrupador está preparado para trabajar con códigos de las clasificaciones internacionales CIE-9 MC, CIE-10, CIAP-1 y CIAP-2. Incluso para hacerlo utilizando simultáneamente distintas clasificaciones, por ejemplo si en el ámbito de la atención primaria se utiliza una de ellas y en el ámbito de la atención especializada otra. Es por ello que se requiere identificar en cada caso (registro) qué codificación se ha utilizado.

El nivel de especificidad depende de la clasificación utilizada y puede superar los 10.000 códigos. A la hora de traba bajar con los GMA generamos Agrupaciones de Códigos Diagnósticos (ACD) con la intención de reducir el número de códigos y asociarlo a enfermedades. Por ejemplo todos los códigos de diagnósticos de la EPOC van a parar a una ACD. Para ello utilizamos una modificación del Clinical Classification Software de la H-CUP [https://www.hcup-us.ahrq.gov/toolssoftware/ccs/ccs.jsp].

Por otro lado la enfermedad crónica tiene una especial relevancia a la hora de generar los GMA por lo que se requiere identificar este atributo en todos los códigos diagnósticos. Para ello utilizamos una modificación del Chronic Condition Indicator de la H-CUP [https://www.hcup-us.ahrq.gov/toolssoftware/chronic/chronic.jsp].

La enfermedad oncológica y el embarazo y/o parto también se tratan de manera especial, y del mismo modo que en el caso de las enfermedades crónicas requiere ser debidamente identificada. En ambos casos caso la identificación de los códigos diagnósticos asociados a neoplasias y embarazo y/o partose ha llevado a cabo mediante revisión caso a caso de las 4 clasificaciones utilizadas.

Finalmente, a nivel de códigos diagnósticos, también es importante identificar el sistema orgánico afectado. Esto será de vital importancia a la hora de analizar la multimorbilidad en asegurados con enfermedades crónicas. En el caso de los GMA se da especial relevancia al hecho de tener diferentes sistemas afectados por enfermedades crónicas y no tanto a tener en sí mismo distintas enfermedades crónicas. Como en los casos anteriores debe identificarse cada código diagnóstico al sistema orgánico que corresponde. Para ello utilizamos los grandes grupos de la CIE: Infeccionas, neoplasias, aparato digestivo, aparato circulatorio, …

Así pues, para cada clasificación (CIE-9, CIE-10, CIAP-1 y CIAP-2) generamos una tabla con la información diagnóstica anterior asociada a cada código diagnóstico:

- Código diagnóstico
- Identificación de cronicidad
- Identificación de patología aguda
- Identificación de neoplasia
- Identificación de embarazo y/o parto
- Identificación del sistema orgánico afectado
- Identificación de la Agrupación de Códigos Diagnósticos

Una vez obtenida la información anterior el nivel de análisis diagnóstico interno (unidad mínima de análisis) se reduce a las ACD.

A nivel de las ACD analizamos las necesidades asistenciales de los asegurados (complejidad) a partir de la información de nuestro sistema. Concretamente a partir de la población asegurada por el Servicio Catalán de la Salud en el año 2011 (7,5 millones de habitantes).

Varios son los indicadores analizados a la hora de intentar medir la complejidad en función de la morbilidad (ACD): mortalidad, ingresos (urgentes, programados, médicos y quirúgicos), visitas en atención primaria, consulta externa, urgencias (atención primaria – especializada), prescripción, medicación hospitalaria de dispoensación ambulatoria, Hospital de dia, estancias en centros sociosanitarios, salud mental, …

A modo de resumen podemos decir que la complejidad queda recogida a partir de tres grandes bloques de información:

- Mortalidad
- Necesidades asistenciales
- Prescripción

Teniendo presente que todas ellas hacen referencia a todos los ámbitos y niveles asistenciales.

Mediante modelización estadística explicamos los indicadores anteriores en función de las ACD consiguiendo asignar en cada caso un valor numérico de complejidad (peso relativo). Este peso relativo o índice de complejidad por ACD nos permitirá asignar a cada asegurado un nivel de complejidad total en función del conjunto de su morbilidad.

Así mismo, a nivel de ACD, identificamos individualmente aquellas que consideramos relevantes. A partir de la agrupación de códigos de patologías relevantes formaremos las etiquetas clínicas. Etiquetas cuyo objetivo es resumir el conjunto de enfermedades relevantes presentes en un asegurado.

En resumen, a nivel de ACD asignamos dos campos de vital importancia:

- Peso relativo de complejidad
- Etiqueta de patología relevante

Este último campo referente a la etiqueta está vacío cuando la patología no se considerada relevante.

Finalmente, cabe mencionar que la agrupación se lleva a cabo para un periodo relativamente amplio (generalmente un año) por lo que es necesario fijar una fecha de inicio y una fecha final.

**Algoritmo de agrupación**

El algoritmo de agrupación incluye las tablas necesarias para obtener de cada problema de salud la información diagnóstica necesaria independientemente de la clasificación utilizada (CIE-9 MC, CIE-10, CIAP-1, CIAP-2).

En particular, y en función de lo expuesto anteriormente, para cada código diagnóstico tenemos la siguiente información:

- Identificación de cronicidad
- Identificación de patología aguda
- Identificación de neoplasia
- Identificación de embarazo y/o parto
- Identificación del sistema orgánico afectado
- Identificación de la ACD
- Peso relativo de complejidad de la ACD
- Etiqueta de patología relevante

**Tratamiento de los registros diagnósticos del fichero de entrada**

El agrupador analiza, registro a registro, cada código diagnóstico.

- **Validación del código diagnóstico** a partir de la edad y del sexo del asegurado. Si se encuentra una incongruencia a partir de la edad o el sexo en problema de salud en cuestión éste no es tenido en cuenta por el agrupador. Con los códigos diagnósticos incongruentes se elabora un fichero de validación para que pueda ser revisado posteriormente.
- **Identificación diagnóstica** a partir de las tablas internas desarrolladas para cada clasificación. A partir del código del problema de salud y de la clasificación utilizada identificamos si el diagnóstico es crónico o agudo, corresponde a una neoplasia o un embarazo y/o parto, a qué sistema orgánico afecta, a que ACD queda asignado, que peso relativo de complejidad tiene, y si corresponde a una patología considerada relevante.
- **Comprobación de la fecha del diagnóstico:** no se consideran problemas de salud diagnosticados con posterioridad a la fecha final del periodo analizado ni los problemas de salud agudos diagnosticados con anterioridad al periodo analizado.

**Tratamiento de los registros a nivel de asegurado**

Llegados a este punto disponemos de toda la información diagnóstica (ACD, cronicidad, neoplasia, sistema orgánico, ...) de todos los problemas de salud de un asegurado.

- **Identificación de neoplasia activa:** Se comprueba si el asegurado presenta alguna ACD asociado a algún diagnóstico de neoplasias con fecha de diagnóstico dentro del periodo de análisis o un año antes.
- **Identificación de embarazo y/o parto:** Se comprueba si el asegurado (en este caso asegurada) presenta alguna ACD asociada a algún diagnóstico de embarazo y/o parto con fecha de diagnóstico dentro del periodo de análisis.
- **Identificación de la patología aguda:** Se comprueba si el asegurado presenta alguna ACD asociada a algún diagnóstico agudo con fecha de diagnóstico dentro del periodo de análisis.
- **Identificación y tratamiento de la patología crónica:** Se comprueba si el asegurado presenta alguna ACD asociada a algún diagnóstico crónico. Tanto si ha sido diagnosticado dentro del periodo de análisis como si ha sido diagnosticado previamente. Dado que el agrupador confiere una especial relevancia a la patología crónica en este caso se analizan tanto el número total de ACD distintas asociadas a patología crónica (número de enfermedades crónicas), como el número total de sistemas afectados por enfermedades crónicas.
- **Asignación de la complejidad por asegurado (peso relativo):** El agrupador asigna un valor numérico como medida relativa de complejidad a nivel individual. Este valor se asigna por cada distinta ACD presente en el asegurado, y no por códigos diagnósticos en si.
- **Asignación de la etiqueta de enfermedades relevantes por asegurado:** El agrupador también asigna una etiqueta resumen con las enfermedades relevantes identificadas en el asegurado. Para ello, en las tablas diagnósticas según clasificaciones (CIE-9, CIE-10, CIAP-1 y CIAP-2) se marcan 80 enfermedades consideradas como relevantes con sus respectivas etiquetas. Cada vez que se identifica una de estas patologías en un mismo asegurado el agrupador las guarda para formar la etiqueta final. En el caso de que la enfermedad relevante corresponda a una neoplasia en la etiqueta se tiene en cuenta si ésta es activa o previa.

**Preparación del fichero de salida con información a nivel de asegurado**

La información a nivel de asegurado obtenida en este punto es la siguiente:

- identificación neo activa
- identificación de enfermedad asociada al embarazo y/o parto
- identificación de enfermedad aguda
- número de enfermedades crónicas
- número de sistemas orgánicos afectados por enfermedad crónica
- peso relativo total (complejidad)
- listado de etiquetas de enfermedades relevantes (si las hubiera)

A partir de la información anterior a nivel de asegurado se lleva a cabo las siguientes tareas:

- **Asignación del Grupo de Morbilidad (GM).** La asignación del GM se lleva a cabo por niveles de prioridad según la siguiente secuencia, es decir, si en un paso el asegurado cumple la condición ya no se miran las siguientes:
- Si el asegurado está identificado como enfermo con neoplasia activa entonces se le asigna este grupo de morbilidad (GM = ‘40’)
- Si la asegurada está identificada con patología relacionada con el embarazo y/o parto entonces se le asigna a este grupo de morbilidad (GM = ‘20’)
- Si el asegurado tiene 4 o más sistemas afectados por enfermedad crónica entonces se le asigna este grupo de morbilidad (GM = ‘33’)
- Si el asegurado tiene 2 o 3 sistemas afectados por enfermedad crónica entonces se le asigna este grupo de morbilidad (GM = ‘32’)
- Si el asegurado tiene 1 sistema afectado por enfermedad crónica entonces se le asigna este grupo de morbilidad (GM = ‘31’)
- Si el asegurado tiene identificada alguna enfermedad aguda (Aguda = 1) entonces se le asigna este grupo de morbilidad (GM = ‘10’)
- En último caso se le asigna el grupo de morbilidad de población sana (GM = ‘00’)
- **Asignación del nivel de complejidad (C):** La asignación del nivel de complejidad del asegurado se lleva a cabo separadamente por grupos de morbilidad y teniendo en cuenta la complejidad total del mismo. Para ello, dentro de cada grupo de morbilidad identificamos 4 puntos de corte a partir de los percentiles 40, 70, 85, y 95 obtenidos a partir de toda la población utilizada para la creación del agrupador. Los valores anteriores quedan fijados en el algoritmo.
- **Asignación del GMA por asegurado:** El código del GMA está formado por tres dígitos y se asigna combinando el grupo de morbilidad (GM) y el nivel de complejidad (1 a 5): *GMA = ‘GM’ + ‘C’*
- **Revisión y actualización de la etiqueta clínica final del asegurado:** La etiqueta final del asegurado se forma concatenando las etiquetas identificadas en el listado de etiquetas del asegurado. Para ello se utiliza un código de prioridad (relevancia). Sin embargo, en muchos asegurados (entre ellos todos los de la población sana) no hay etiqueta alguna identificada. Si no existe etiqueta relevante alguna identificada en el asegurado y el grupo de morbilidad es el de población sana, patología aguda o embarazo y/o parto (GM = ‘00’, GM = ‘10’, GM = ‘20’ respectivamente) entonces se le asigna la etiqueta ‘Sin patología crónica’. Si el asegurado presenta enfemedad crónica pero no s considerada como relevante se le asigna la etiqueta “otras enfermedades crónicas”.
- **Devolución de resultados por asegurado.** Los campos finales que devuelve el agrupador son:
- Identificador del asegurado
- Código del Grupo de Morbilidad Ajustado
- Número de enfermedades crónicas presentes
- Número de sistemas orgánicos afectados por enfermedad crónica
- Peso relativo total del asegurado (complejidad)
- Etiqueta clínica resumen del conjunto de enfermedades relevantes identificadas en el asegurado.

En la figura puede verse un esquema como resumen del algoritmo de agrupación.
